# Supplementary figures and images for: Lower Levels of Transaminases but Higher Levels of Serum Creatinine in Patients with Acute Hepatitis E in Comparison to Patients with Hepatitis A
Source: MDPI journal article supplement (doi:10.3390/pathogens10010060), 2021-01-12

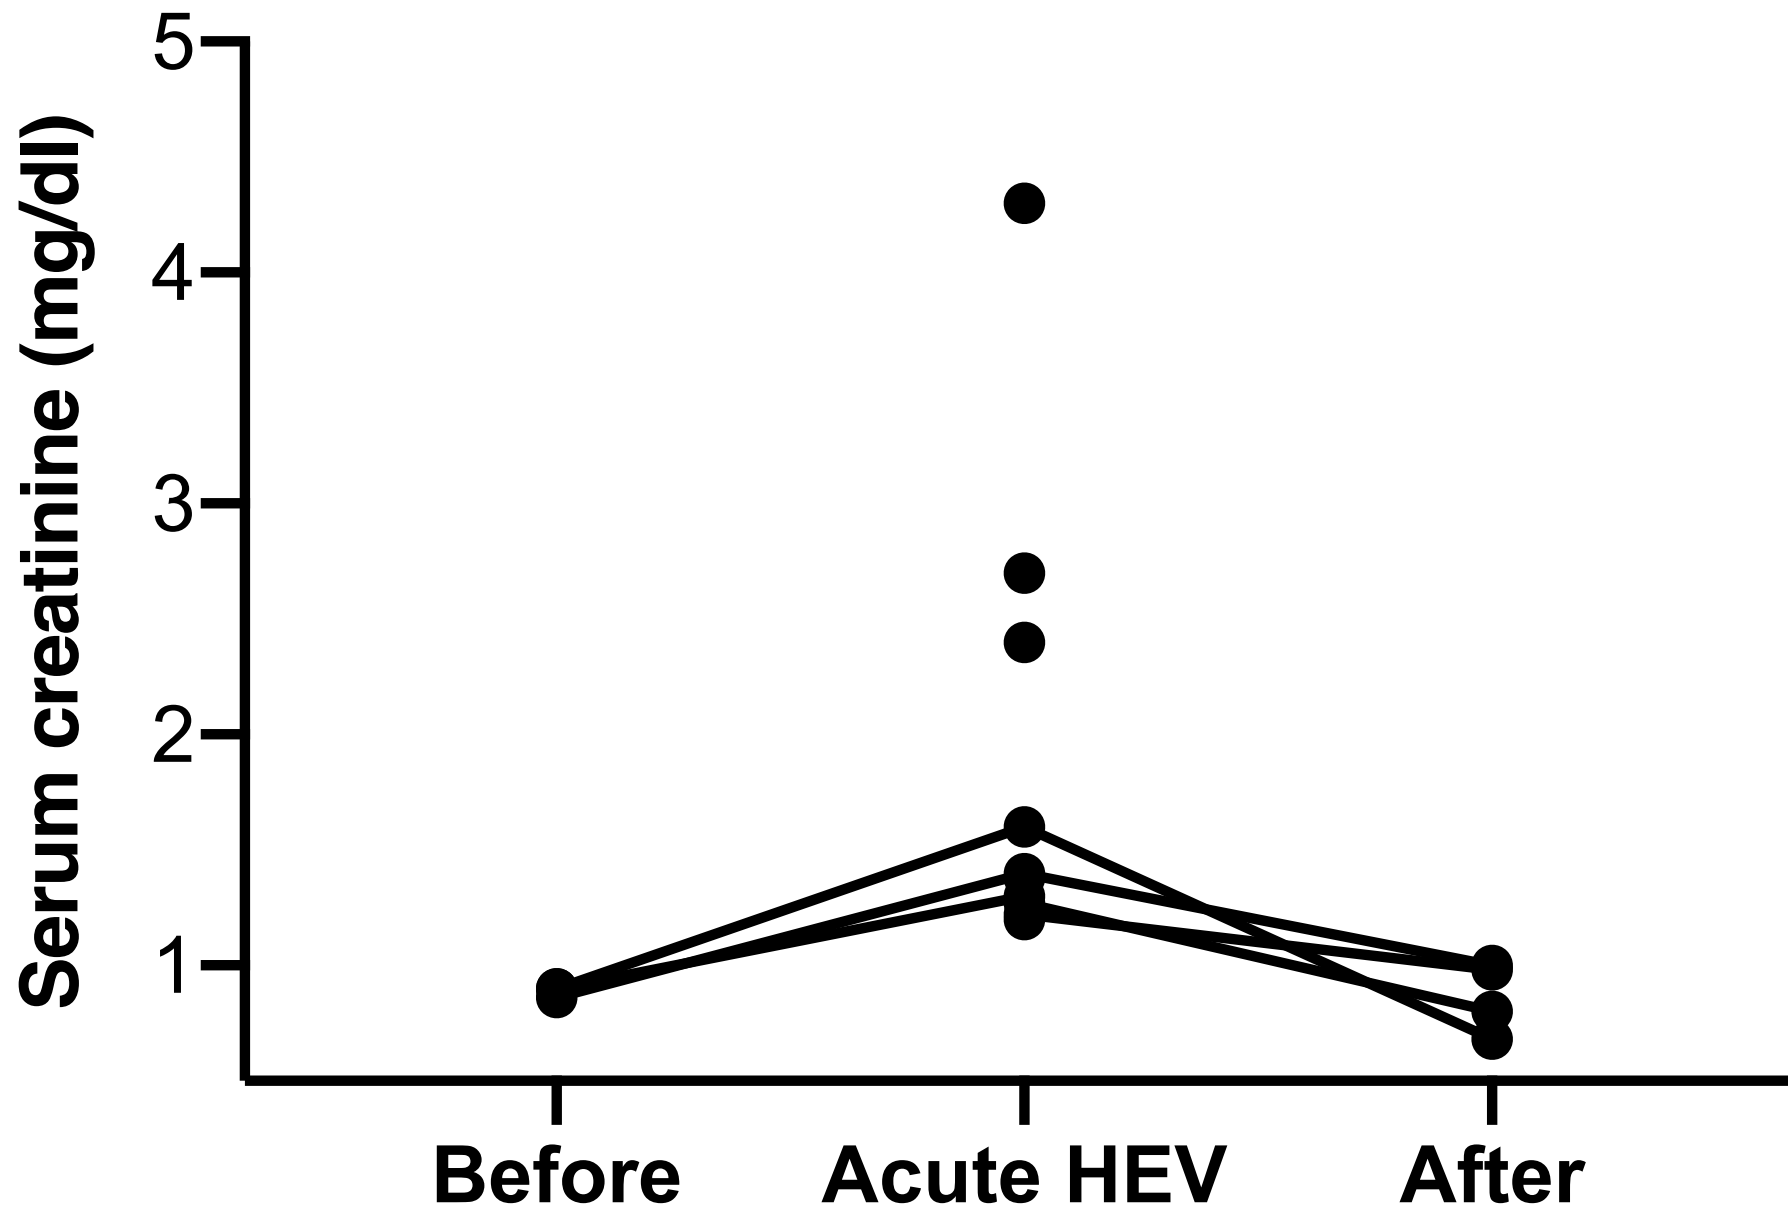

Supplement: s1 [file s1]
